# Supplementary material for: A Meta-Analysis of Slow Pull versus Suction for Endoscopic Ultrasound-Guided Tissue Acquisition
Source: PubMed Central journal article supplement — Gut Liver. 2021 Feb 19;15(4):625–33. doi: 10.5009/gnl20270 (PMC8283288; doi:10.5009/gnl20270), 2021-02-19
Supplement: gnl-15-4-625-supple.pdf [file gnl-15-4-625-supple.pdf]

Search Queries for PubMed

| Query |                                                                                       |
|-------|---------------------------------------------------------------------------------------|
| 1     | Endoscopic ultrasonography OR EUS-FNA OR fine needle aspiration OR fine needle biopsy |
| 2     | Slow pull OR capillary OR suction                                                     |
| 3     | English[lang]                                                                         |
| 4     | ("0001/01/01"[PDAT]: "2020/01/31"[PDAT])                                              |
| 5     | 1, 2, 3, and 4                                                                        |

Search Queries for Web of Science

| Query |                                                                                       |
|-------|---------------------------------------------------------------------------------------|
| 1     | Endoscopic ultrasonography OR EUS-FNA OR fine needle aspiration OR fine needle biopsy |
| 2     | Slow pull OR capillary OR suction                                                     |
| 3     | 1 and 2                                                                               |

Search Queries for Cochrane Central Registration of Controlled Trials Database

| Query |                                                                                                                             |
|-------|-----------------------------------------------------------------------------------------------------------------------------|
| #1    | Endoscopic ultrasonography OR EUS-FNA OR fine needle aspiration OR fine needle biopsy AND slow pull OR capillary OR suction |
| #2    | Limit 1 to English language                                                                                                 |

**Supplementary Fig. 1.** Search queries.

EUS, endoscopic ultrasound; FNA, fine-needle aspiration.

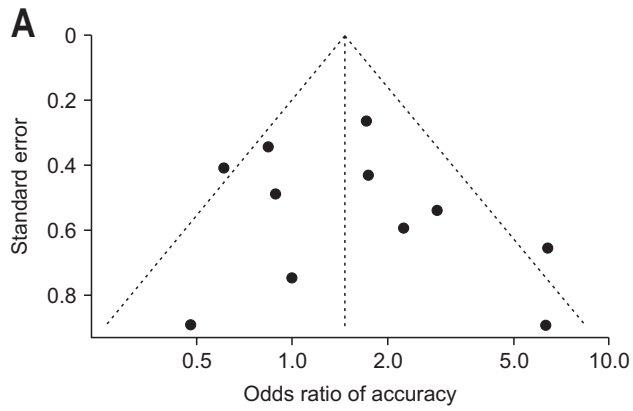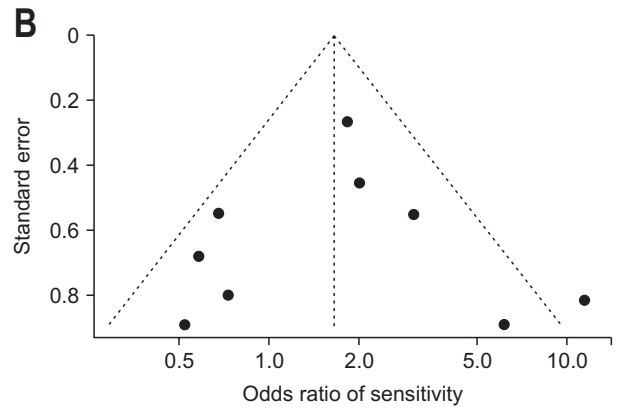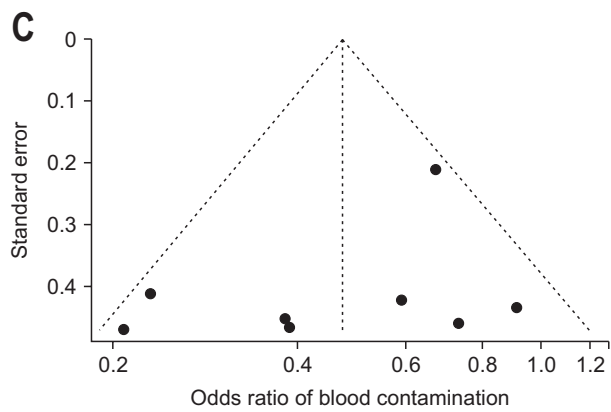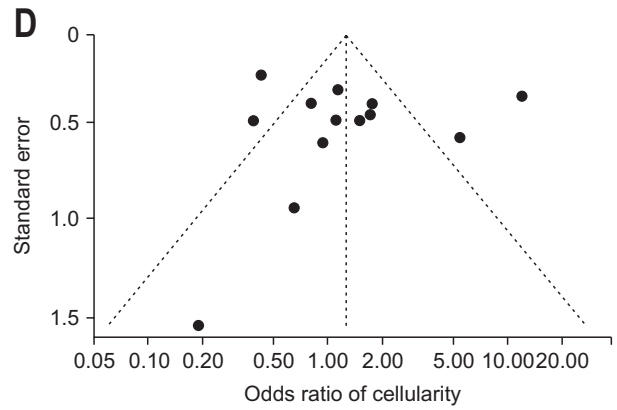

**Supplementary Fig. 2.** Funnel plots to examine potential publication bias in odds ratio of slow pull versus conventional suction. (A) Accuracy. (B) Sensitivity. (C) Blood contamination. (D) Cellularity. The X-axis represents odds ratio, and the Y-axis displays the standard error of log (odds ratio).
